# Supplementary material for: Recent trends in energy and nutrient content of take-home food and beverage purchases in Great Britain: an analysis of 225 million food and beverage purchases over 6 years
Source: PubMed Central journal article supplement (PMC7664498; doi:10.1136/bmjnph-2019-000036), 2019-08-01

## Online Supplementary materials

Supplementary Table S1 - Daily take-home energy and nutrient purchases per capita in Great Britain<sup>1</sup>

|                             | 2012   |                  | 2013   |                  | 2014   |                  | 2015   |                  | 2016   |                  | 2017   |                  |
|-----------------------------|--------|------------------|--------|------------------|--------|------------------|--------|------------------|--------|------------------|--------|------------------|
|                             | Total  | (95% CI)         | Total  | (95% CI)         | Total  | (95% CI)         | Total  | (95% CI)         | Total  | (95% CI)         | Total  | (95% CI)         |
| Energy                      | 1904.9 | (1898.0, 1911.8) | 1897.4 | (1890.7, 1904.1) | 1872.1 | (1865.4, 1878.8) | 1869.8 | (1863.1, 1876.5) | 1860.7 | (1853.9, 1867.4) | 1869.6 | (1862.5, 1876.6) |
| Fat                         | 74.4   | (74.1, 74.7)     | 74.1   | (73.8, 74.4)     | 73.9   | (73.6, 74.3)     | 74.2   | (73.9, 74.6)     | 74.2   | (73.8, 74.5)     | 74.4   | (74.1, 74.8)     |
| Protein                     | 63.6   | (63.4, 63.9)     | 63.2   | (63.0, 63.4)     | 63.7   | (63.5, 64.0)     | 64.1   | (63.9, 64.4)     | 64.2   | (64.0, 64.5)     | 65.3   | (65.1, 65.6)     |
| Carbohydrate                | 228.1  | (227.2, 229.0)   | 225.7  | (224.8, 226.6)   | 219.5  | (218.6, 220.4)   | 217.7  | (216.9, 218.6)   | 214.9  | (214.0, 215.7)   | 215.0  | (214.1, 215.9)   |
| Sugar                       | 106.1  | (105.6, 106.6)   | 106.2  | (105.7, 106.7)   | 106.6  | (106.1, 107.1)   | 105.1  | (104.6, 105.6)   | 102.9  | (102.4, 103.4)   | 101.7  | (101.2, 102.2)   |
| Saturated fat               | 28.3   | (28.2, 28.5)     | 28.5   | (28.4, 28.7)     | 28.4   | (28.3, 28.5)     | 28.5   | (28.4, 28.7)     | 28.6   | (28.5, 28.7)     | 28.7   | (28.6, 28.9)     |
| Sodium                      | 2.4    | (2.34, 2.36)     | 2.4    | (2.35, 2.38)     | 2.3    | (2.26, 2.29)     | 2.3    | (2.27, 2.30)     | 2.2    | (2.23, 2.26)     | 2.3    | (2.26, 2.30)     |
| NSP Fibre                   | 16.94  | (16.88, 17.00)   | 16.81  | (16.75, 16.88)   | 16.43  | (16.37, 16.49)   | 16.64  | (16.58, 16.70)   | 16.51  | (16.44, 16.57)   | 16.62  | (16.56, 16.68)   |
| Carbohydrate<br>excl. sugar | 122.0  | (121.5, 122.6)   | 119.5  | (118.9, 120.0)   | 112.9  | (112.4, 113.4)   | 112.6  | (112.1, 113.1)   | 112.0  | (111.4, 112.5)   | 113.3  | (112.8, 113.8)   |

<sup>1</sup>Data are from 213,663,901 transactions reported by 50,672 households participating in Kantar Worldpanel UK between 2012 and 2017. Values are mean daily per capita energy and nutrient purchased to take-home. Some puddings, biscuits, and bread products, as well as all bacon and sausages, slimming products and milkshake mixes were excluded because of inconsistent nutrient information reported at product level. Products excluded could account for up 130kcal/capita/day each year.

Supplementary Table S2 - Changes in healthier food groups contributions to energy and nutrient purchased to take-home with 95% confidence intervals (Kantar Worldpanel UK 2012-2017)

| Healthier food groups <sup>2</sup>     | $\Delta$ 2017 - 2012 <sup>1</sup> |                 |                  |                 |         |            |               |                |               |              |               |
|----------------------------------------|-----------------------------------|-----------------|------------------|-----------------|---------|------------|---------------|----------------|---------------|--------------|---------------|
|                                        | Kcal<br>2012                      | (95% CI)        | Energy<br>(kcal) | (95% CI)        | p-value | Fat<br>(g) | (95% CI)      | Protein<br>(g) | (95% CI)      | Sugar<br>(g) | (95% CI)      |
| Pasta, rice, potatoes and other grains | 126.63                            | (125.77,127.49) | -18.12           | (-19.32,-16.93) | <0.001  | -0.18      | (-0.20,-0.17) | -0.49          | (-0.52,-0.45) | -0.17        | (-0.18,-0.16) |
| Bread products                         | 176.39                            | (175.39,177.39) | -13.33           | (-14.67,-11.99) | <0.001  | -0.13      | (-0.15,-0.11) | -0.26          | (-0.34,-0.18) | -0.15        | (-0.17,-0.12) |
| Fruits                                 | 65.16                             | (64.78,65.53)   | -1.06            | (-1.60,-0.52)   | <0.001  | 0.11       | (0.10,0.12)   | 0.07           | (0.06,0.07)   | 0.89         | (0.77,1.00)   |
| Milk                                   | 120.27                            | (119.22,121.32) | -0.18            | (-1.74,1.38)    | 0.778   | -0.32      | (-0.40,-0.24) | 0.24           | (0.15,0.34)   | 0.30         | (0.16,0.43)   |
| Other dairy                            | 19.95                             | (19.80,20.11)   | -0.01            | (-0.22,0.21)    | 0.797   | 0.02       | (0.02,0.03)   | 0.06           | (0.05,0.07)   | -0.14        | (-0.16,-0.11) |
| Legumes, nuts and seeds                | 26.62                             | (26.37,26.86)   | 0.30             | (-0.08,0.68)    | 0.243   | 0.19       | (0.16,0.22)   | -0.10          | (-0.12,-0.08) | -0.12        | (-0.13,-0.10) |
| Sauces and condiments                  | 2.44                              | (2.39,2.49)     | 1.13             | (1.06,1.20)     | <0.001  | 0.09       | (0.08,0.09)   | 0.02           | (0.02,0.03)   | -0.02        | (-0.02,-0.01) |
| Other drinks                           | 8.36                              | (8.23,8.49)     | 2.10             | (1.89,2.31)     | <0.001  | 0.06       | (0.05,0.06)   | 0.03           | (0.02,0.05)   | 0.19         | (0.15,0.22)   |
| Ready meals and convenience food       | 107.48                            | (106.89,108.06) | 2.56             | (1.73,3.38)     | <0.001  | 0.13       | (0.09,0.16)   | 0.19           | (0.16,0.22)   | 0.04         | (0.02,0.05)   |
| Proteins                               | 75.56                             | (75.04,76.08)   | 3.89             | (3.12,4.66)     | <0.001  | 0.16       | (0.11,0.20)   | 0.76           | (0.66,0.87)   | -0.03        | (-0.04,-0.03) |
| Red meat                               | 23.30                             | (23.10,23.50)   | 5.15             | (4.87,5.42)     | <0.001  | 0.24       | (0.22,0.25)   | 0.47           | (0.44,0.51)   | 0.00         | (0.00,0.00)   |
| Processed fish and meat                | 24.76                             | (24.56,24.96)   | 5.25             | (4.94,5.57)     | <0.001  | 0.21       | (0.19,0.22)   | 0.40           | (0.37,0.44)   | 0.02         | (0.02,0.02)   |
| Breakfast cereals                      | 37.90                             | (37.63,38.17)   | 8.02             | (7.59,8.44)     | <0.001  | 0.07       | (0.06,0.08)   | 0.19           | (0.17,0.20)   | 0.21         | (0.19,0.22)   |
| Vegetables, excl. legumes and potatoes | 42.03                             | (41.80,42.25)   | 9.97             | (9.60,10.33)    | <0.001  | 0.19       | (0.17,0.21)   | 0.19           | (0.18,0.21)   | 0.58         | (0.54,0.61)   |

<sup>1</sup>Energy and nutrients changes given as /capita/day.

<sup>2</sup>Some puddings, biscuits, and bread products, as well as all bacon and sausages, slimming products and milkshake mixes were excluded because of inconsistent nutrient information reported at product level. Products excluded could account for up 130kcal/capita/day each year.

Supplementary Table S2 (continued) - Changes in healthier food groups contributions to energy and nutrient purchased to take-home with 95% confidence intervals (Kantar Worldpanel UK 2012-2017)

| <i>Healthier food groups</i> <sup>2</sup> | $\Delta$ 2017- 2012 <sup>1</sup> |               |            |               |               |               |                              |               |
|-------------------------------------------|----------------------------------|---------------|------------|---------------|---------------|---------------|------------------------------|---------------|
|                                           | Saturated fat (g)                | (95% CI)      | Sodium (g) | (95% CI)      | NSP fibre (g) | (95% CI)      | Carbohydrate excl. sugar (g) | (95% CI)      |
| Pasta, rice, potatoes and other grains    | -0.04                            | (-0.04,-0.04) | -0.01      | (-0.01,-0.01) | -0.11         | (-0.13,-0.09) | -3.35                        | (-3.59,-3.11) |
| Bread products                            | -0.02                            | (-0.02,-0.01) | -0.03      | (-0.03,-0.03) | -0.26         | (-0.29,-0.24) | -2.51                        | (-2.74,-2.28) |
| Fruits                                    | 0.05                             | (0.05,0.06)   | 0.00       | (0.00,0.00)   | 0.06          | (0.05,0.07)   | -1.59                        | (-1.63,-1.55) |
| Milk                                      | -0.12                            | (-0.17,-0.06) | 0.01       | (0.01,0.01)   | -0.05         | (-0.06,-0.05) | 0.00                         | (-0.01,0.01)  |
| Other dairy                               | 0.01                             | (0.01,0.02)   | 0.00       | (0.00,0.00)   | -0.02         | (-0.02,-0.02) | -0.07                        | (-0.08,-0.06) |
| Legumes, nuts and seeds                   | 0.02                             | (0.02,0.03)   | -0.01      | (-0.01,-0.01) | -0.09         | (-0.11,-0.08) | -0.33                        | (-0.37,-0.30) |
| Sauces and condiments                     | 0.01                             | (0.01,0.01)   | 0.00       | (0.00,0.00)   | 0.02          | (0.02,0.02)   | -0.01                        | (-0.02,-0.01) |
| Other drinks                              | 0.02                             | (0.02,0.02)   | 0.01       | (0.01,0.01)   | -0.02         | (-0.03,-0.01) | 0.12                         | (0.11,0.13)   |
| Ready meals and convenience food          | 0.07                             | (0.06,0.08)   | 0.00       | (0.00,0.00)   | -0.02         | (-0.04,-0.01) | -0.22                        | (-0.34,-0.11) |
| Proteins                                  | 0.02                             | (0.01,0.03)   | 0.01       | (0.01,0.01)   | 0.02          | (0.01,0.02)   | -0.04                        | (-0.06,-0.02) |
| Red meat                                  | 0.09                             | (0.09,0.10)   | 0.00       | (0.00,0.00)   | 0.00          | (0.00,0.00)   | 0.00                         | (0.00,0.00)   |
| Processed fish and meat                   | 0.04                             | (0.04,0.04)   | 0.01       | (0.01,0.01)   | 0.00          | (0.00,0.00)   | 0.20                         | (0.19,0.22)   |
| Breakfast cereals                         | 0.01                             | (0.01,0.01)   | 0.00       | (0.00,0.00)   | 0.12          | (0.11,0.14)   | 1.24                         | (1.17,1.31)   |
| Vegetables, excl. legumes and potatoes    | 0.02                             | (0.02,0.03)   | 0.01       | (0.01,0.01)   | 0.28          | (0.26,0.29)   | 0.65                         | (0.62,0.69)   |

<sup>1</sup>Energy and nutrients changes given as /capita/day.

<sup>2</sup>Some puddings, biscuits, and bread products, as well as all bacon and sausages, slimming products and milkshake mixes were excluded because of inconsistent nutrient information reported at product level. Products excluded could account for up 130kcal/capita/day each year.

Supplementary Table S3 - Changes in less healthy food groups contributions to energy and nutrient purchased to take-home with 95% confidence intervals (Kantar Worldpanel UK 2012-2017)

| <i>Less healthy food groups</i> <sup>2</sup> | Kcal<br>2012 | (95% CI)        | $\Delta$ 2017 - 2012 <sup>1</sup> |                 |         |            |               |                |               |              |               |
|----------------------------------------------|--------------|-----------------|-----------------------------------|-----------------|---------|------------|---------------|----------------|---------------|--------------|---------------|
|                                              |              |                 | Energy<br>(kcal)                  | (95% CI)        | p-value | Fat<br>(g) | (95% CI)      | Protein<br>(g) | (95% CI)      | Sugar<br>(g) | (95% CI)      |
| Fat and oil                                  | 162.87       | (161.78,163.96) | -15.11                            | (-16.85,-13.38) | <0.001  | -1.62      | (-1.81,-1.43) | -0.03          | (-0.03,-0.03) | -0.02        | (-0.02,-0.02) |
| Caloric sweeteners                           | 58.44        | (57.90,58.99)   | -11.37                            | (-12.15,-10.59) | <0.001  | 0.00       | (0.00,0.00)   | -0.01          | (-0.01,-0.01) | -2.64        | (-2.84,-2.45) |
| Breakfast cereals                            | 44.80        | (44.54,45.05)   | -9.51                             | (-9.85,-9.18)   | <0.001  | -0.03      | (-0.05,-0.02) | -0.19          | (-0.20,-0.19) | -0.72        | (-0.75,-0.69) |
| Red meat                                     | 24.34        | (24.16,24.53)   | -7.79                             | (-8.04,-7.54)   | <0.001  | -0.61      | (-0.63,-0.59) | -0.67          | (-0.69,-0.65) | -0.01        | (-0.01,0.00)  |
| Puddings and biscuits                        | 184.12       | (183.30,184.94) | -6.79                             | (-7.93,-5.65)   | <0.001  | -0.07      | (-0.13,-0.02) | -0.18          | (-0.19,-0.16) | -0.48        | (-0.59,-0.37) |
| Juices                                       | 29.24        | (29.00,29.48)   | -6.12                             | (-6.45,-5.79)   | <0.001  | 0.00       | (0.00,0.00)   | -0.06          | (-0.06,-0.05) | -1.44        | (-1.51,-1.36) |
| Ready meals and convenience food             | 57.89        | (57.50,58.28)   | -5.98                             | (-6.48,-5.48)   | <0.001  | -0.38      | (-0.41,-0.34) | -0.10          | (-0.12,-0.09) | -0.03        | (-0.04,-0.02) |
| Other drinks                                 | 28.63        | (28.33,28.93)   | -4.79                             | (-5.24,-4.35)   | <0.001  | -0.01      | (-0.02,0.00)  | -0.04          | (-0.05,-0.03) | -0.88        | (-0.99,-0.78) |
| Alcohol                                      | 74.73        | (73.81,75.64)   | 0.39                              | (-0.96,1.74)    | 0.682   | 0.03       | (0.03,0.04)   | 0.00           | (-0.01,0.01)  | 0.05         | (-0.02,0.12)  |
| Other morning goods                          | 25.41        | (25.17,25.66)   | 0.72                              | (0.39,1.04)     | <0.001  | 0.00       | (-0.02,0.02)  | 0.03           | (0.02,0.04)   | 0.12         | (0.10,0.14)   |
| Other dairy                                  | 24.64        | (24.39,24.89)   | 0.82                              | (0.45,1.18)     | <0.001  | 0.17       | (0.14,0.20)   | -0.04          | (-0.05,-0.03) | -0.16        | (-0.19,-0.13) |
| Bread product                                | 28.06        | (27.87,28.25)   | 1.46                              | (1.19,1.73)     | <0.001  | 0.01       | (0.00,0.03)   | 0.02           | (0.02,0.03)   | 0.03         | (0.02,0.04)   |
| Sauces and condiments                        | 28.25        | (28.03,28.47)   | 1.93                              | (1.58,2.28)     | <0.001  | 0.23       | (0.20,0.27)   | 0.02           | (0.01,0.02)   | -0.03        | (-0.05,-0.01) |
| Chocolates and confectionary                 | 105.25       | (104.60,105.91) | 3.83                              | (2.93,4.73)     | <0.001  | 0.42       | (0.37,0.47)   | 0.07           | (0.05,0.08)   | 0.16         | (0.04,0.27)   |
| Processed fish and meat                      | 36.53        | (36.25,36.82)   | 3.95                              | (3.56,4.33)     | <0.001  | 0.20       | (0.17,0.23)   | 0.60           | (0.57,0.63)   | 0.02         | (0.02,0.02)   |
| Cheese                                       | 59.20        | (58.86,59.54)   | 5.95                              | (5.41,6.49)     | <0.001  | 0.48       | (0.44,0.53)   | 0.41           | (0.37,0.44)   | -0.08        | (-0.08,-0.07) |
| Savoury snacks                               | 75.57        | (75.12,76.01)   | 7.41                              | (6.79,8.04)     | <0.001  | 0.39       | (0.35,0.43)   | 0.12           | (0.10,0.13)   | 0.11         | (0.10,0.12)   |
| Table salt                                   | -            | -               | -                                 | -               | -       | -          | -             | -              | -             | -            | -             |

<sup>1</sup>Energy and nutrients changes given as /capita/day.

<sup>2</sup>Some puddings, biscuits, and bread products, as well as all bacon and sausages, slimming products and milkshake mixes were excluded because of inconsistent nutrient information reported at product level. Products excluded could account for up 130kcal/capita/day each year.

Supplementary Table S3 (continued) - Changes in less healthy food groups contributions to energy and nutrient purchased to take-home with 95% confidence intervals (Kantar Worldpanel UK 2012-2017)

| <i>Healthier food groups</i> <sup>2</sup> | $\Delta$ 2017- 2012 <sup>1</sup> |               |            |               |               |               |                              |               |
|-------------------------------------------|----------------------------------|---------------|------------|---------------|---------------|---------------|------------------------------|---------------|
|                                           | Saturated fat (g)                |               | Sodium (g) |               | NSP fibre (g) |               | Carbohydrate excl. sugar (g) |               |
|                                           |                                  | (95% CI)      |            | (95% CI)      |               | (95% CI)      |                              | (95% CI)      |
| Fat and oil                               | -0.20                            | (-0.25,-0.16) | -0.03      | (-0.03,-0.02) | -0.01         | (-0.02,-0.01) | -0.04                        | (-0.05,-0.04) |
| Caloric sweeteners                        | 0.00                             | (0.00,0.00)   | 0.00       | (0.00,0.00)   | 0.00          | (0.00,0.00)   | -0.16                        | (-0.17,-0.15) |
| Breakfast cereals                         | -0.02                            | (-0.03,-0.02) | -0.02      | (-0.02,-0.02) | -0.10         | (-0.12,-0.09) | -1.41                        | (-1.46,-1.37) |
| Red meat                                  | -0.31                            | (-0.32,-0.30) | -0.01      | (-0.01,-0.01) | 0.00          | (0.00,0.00)   | 0.01                         | (0.01,0.01)   |
| Puddings and biscuits                     | 0.07                             | (0.04,0.10)   | 0.00       | (0.00,0.00)   | -0.08         | (-0.09,-0.07) | -1.04                        | (-1.13,-0.95) |
| Juices                                    | 0.00                             | (0.00,0.00)   | -0.01      | (-0.01,-0.01) | -0.02         | (-0.02,-0.01) | 0.00                         | (-0.01,0.01)  |
| Ready meals and convenience food          | -0.13                            | (-0.14,-0.12) | -0.01      | (-0.02,-0.01) | -0.08         | (-0.09,-0.08) | -0.57                        | (-0.61,-0.53) |
| Other drinks                              | 0.00                             | (-0.01,0.00)  | -0.01      | (-0.01,-0.01) | 0.00          | (0.00,0.01)   | -0.26                        | (-0.29,-0.24) |
| Alcohol                                   | 0.02                             | (0.02,0.02)   | 0.00       | (0.00,0.00)   | 0.00          | (0.00,0.00)   | 0.40                         | (0.37,0.42)   |
| Other morning goods                       | 0.03                             | (0.02,0.04)   | 0.00       | (0.00,0.00)   | 0.01          | (0.00,0.01)   | 0.09                         | (0.05,0.13)   |
| Other dairy                               | 0.10                             | (0.08,0.12)   | 0.00       | (0.00,0.00)   | -0.01         | (-0.01,-0.01) | 0.00                         | (-0.03,0.02)  |
| Bread product                             | 0.02                             | (0.01,0.03)   | 0.00       | (0.00,0.00)   | 0.01          | (0.01,0.01)   | 0.16                         | (0.13,0.19)   |
| Sauces and condiments                     | 0.00                             | (0.00,0.01)   | 0.00       | (0.00,0.01)   | 0.02          | (0.02,0.02)   | -0.05                        | (-0.07,-0.04) |
| Chocolates and confectionary              | 0.19                             | (0.16,0.21)   | 0.00       | (0.00,0.00)   | 0.02          | (0.01,0.02)   | -0.46                        | (-0.49,-0.42) |
| Processed fish and meat                   | 0.08                             | (0.07,0.10)   | 0.02       | (0.02,0.02)   | 0.00          | (0.00,0.00)   | -0.11                        | (-0.12,-0.10) |
| Cheese                                    | 0.32                             | (0.29,0.35)   | 0.01       | (0.01,0.01)   | -0.02         | (-0.02,-0.02) | 0.08                         | (0.08,0.09)   |
| Savoury snacks                            | 0.01                             | (0.01,0.02)   | 0.01       | (0.00,0.01)   | 0.06          | (0.05,0.06)   | 0.58                         | (0.52,0.64)   |
| Table salt                                | -                                | -             | -0.03      | (-0.04,-0.02) | -             | -             | -                            | -             |

<sup>1</sup> Energy and nutrients changes given as /capita/day.

<sup>2</sup> Some puddings, biscuits, and bread products, as well as all bacon and sausages, slimming products and milkshake mixes were excluded because of inconsistent nutrient information reported at product level. Products excluded could account for up 130kcal/capita/day each year.

Supplementary Figure S1: Data flow chart

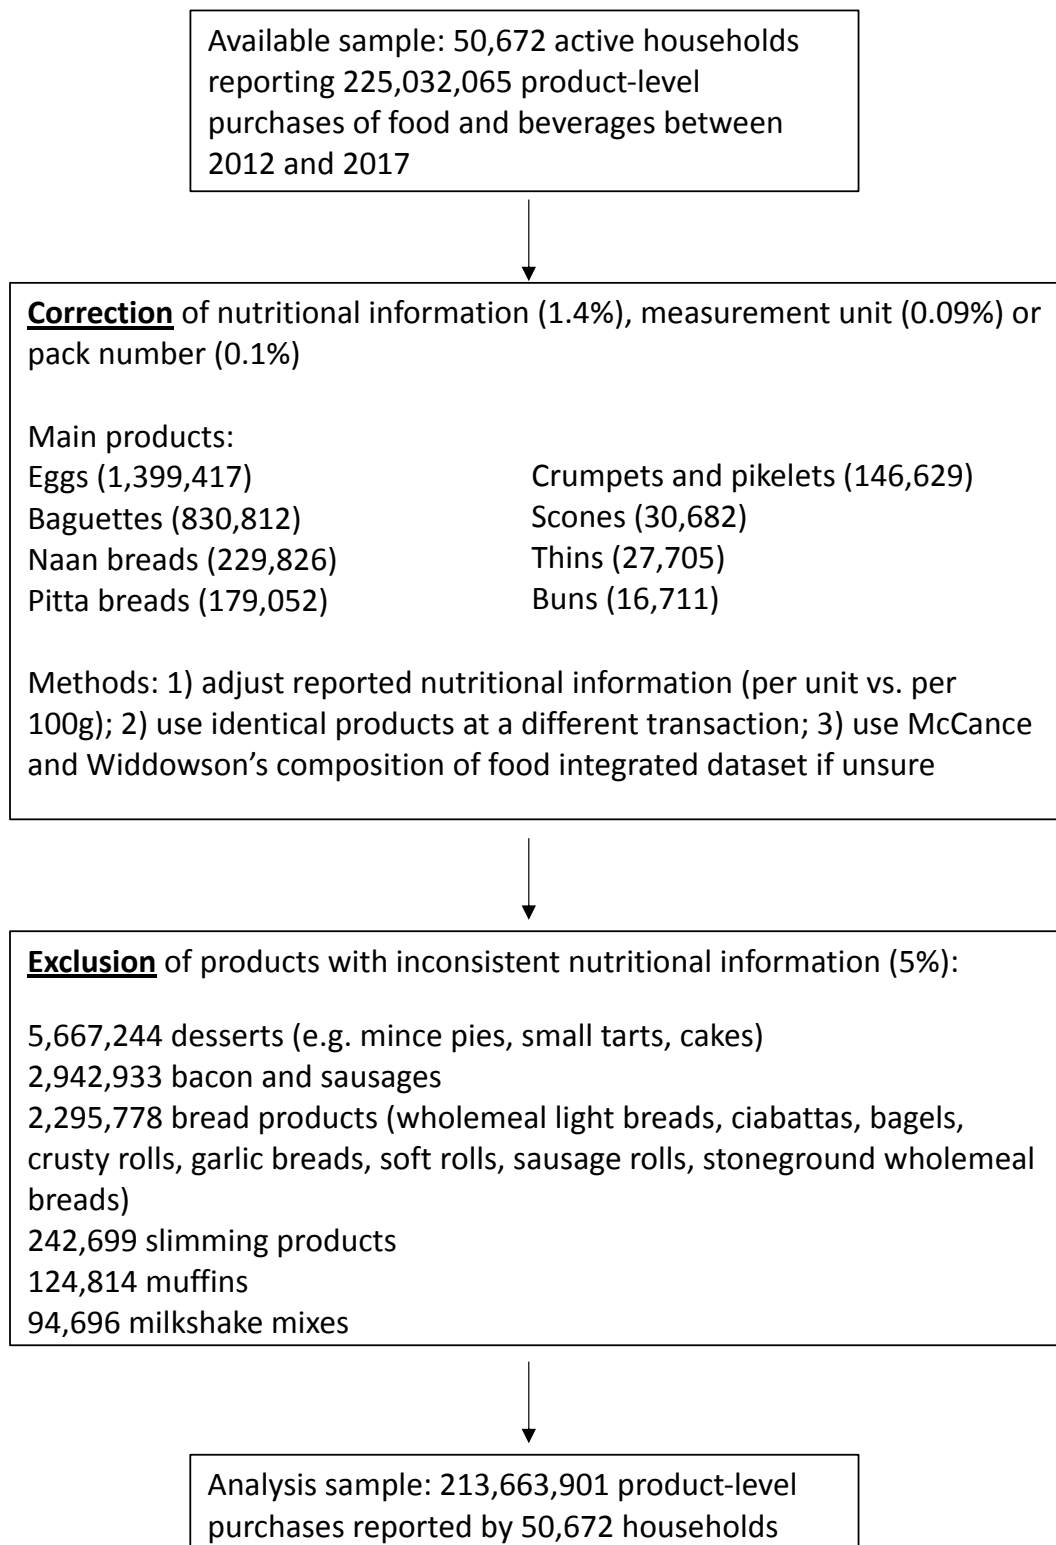

Supplement: bmjnph-2019-000036supp001.pdf [file bmjnph-2019-000036supp001.pdf]
